# Supplementary figures and images for: Influence of climate and biological variables on temporal trends of persistent organic pollutants in Arctic char and ringed seals from Greenland
Source: Royal Society of Chemistry journal article supplement (doi:10.1039/c9em00561g), 2020-01-01

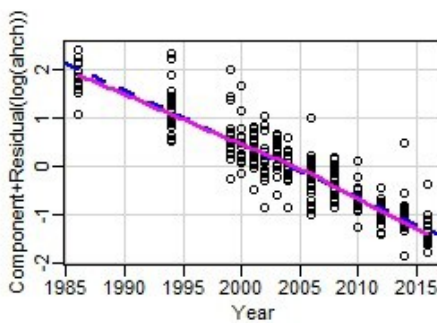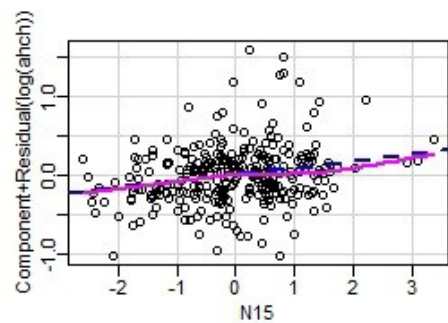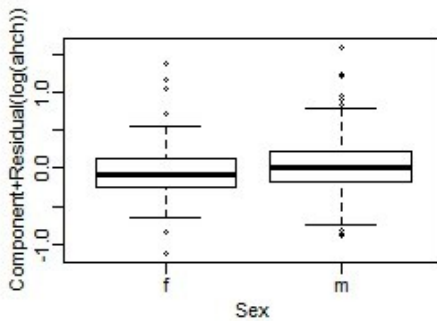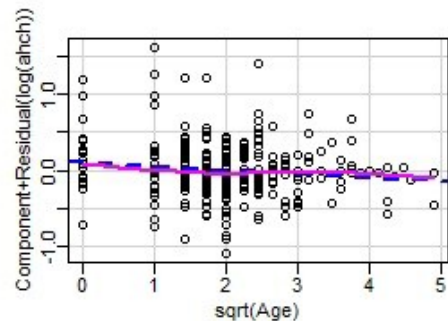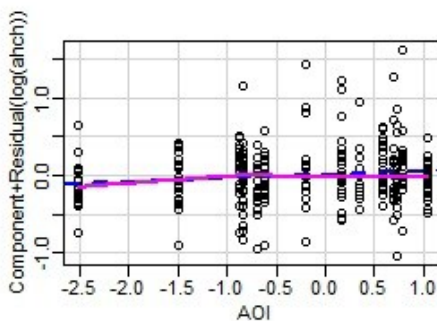

Supplement: c9em00561g10.pdf [file c9em00561g10.pdf]

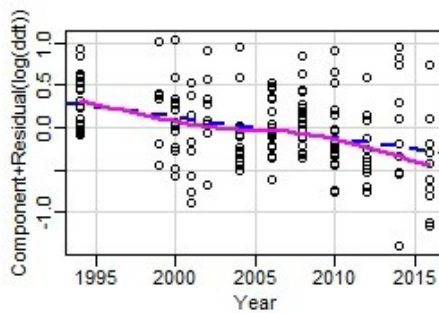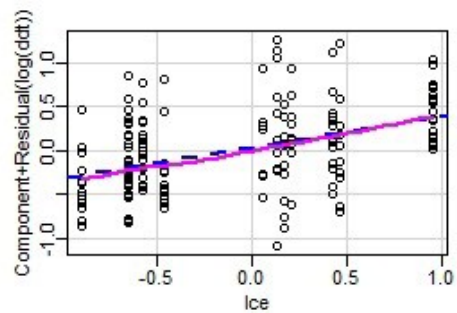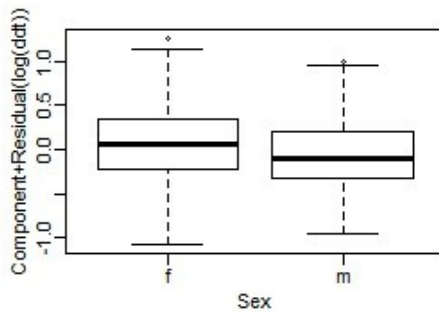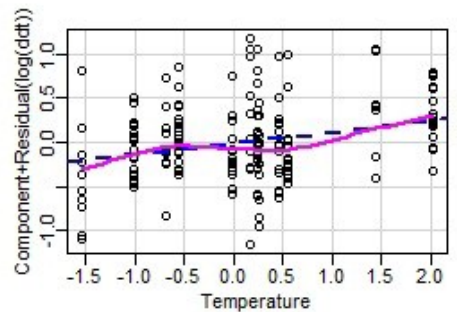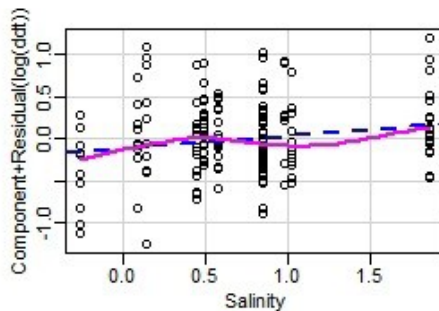

Supplement: c9em00561g18.pdf [file c9em00561g18.pdf]

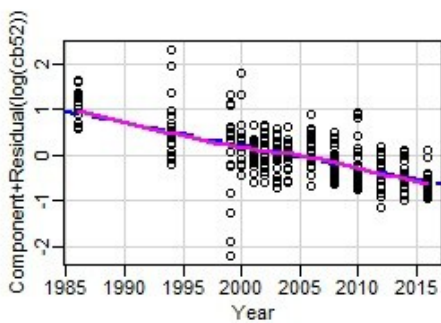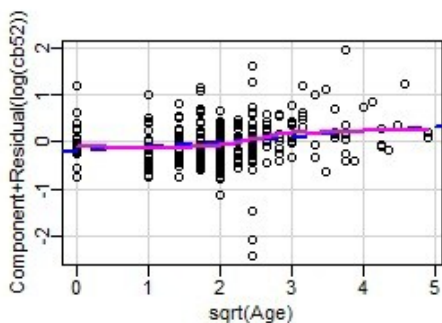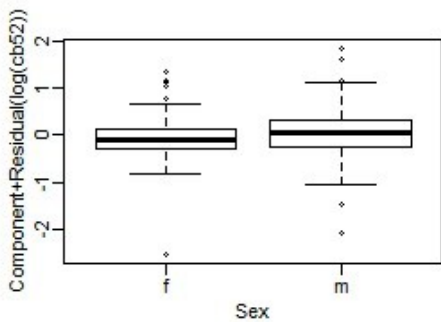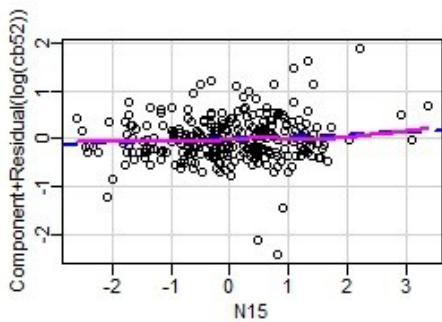

Supplement: c9em00561g6.pdf [file c9em00561g6.pdf]

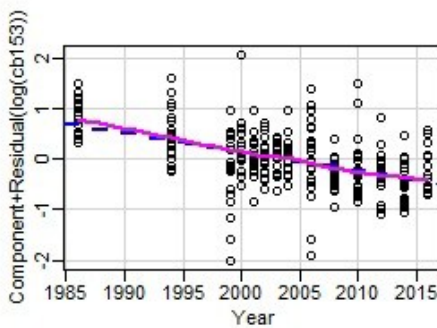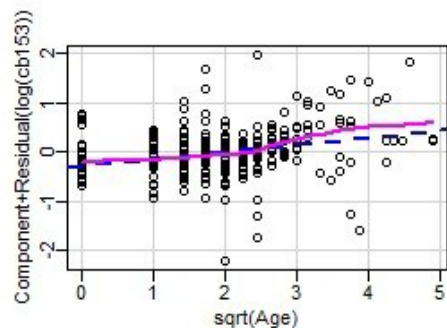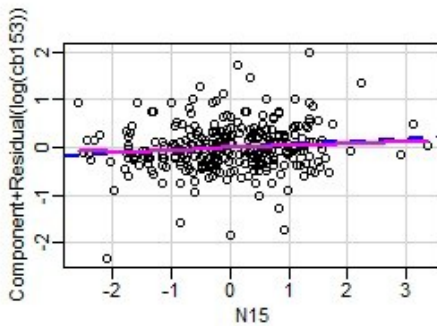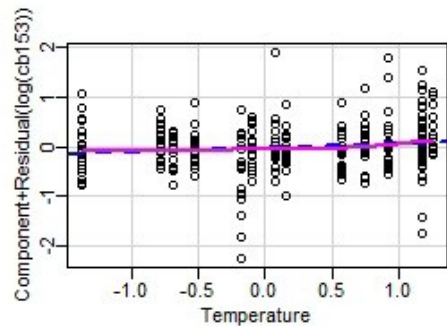

Supplement: c9em00561g7.pdf [file c9em00561g7.pdf]

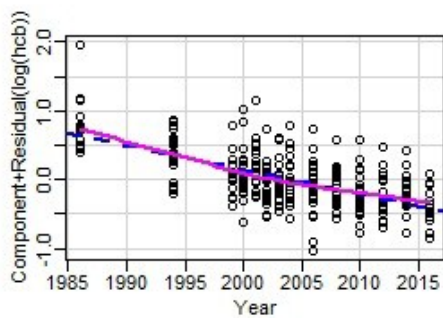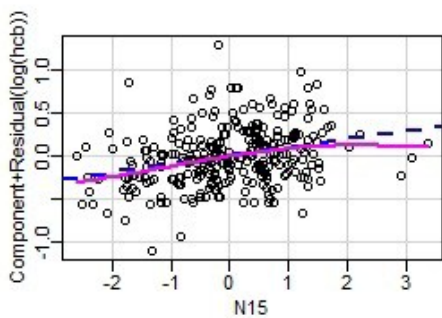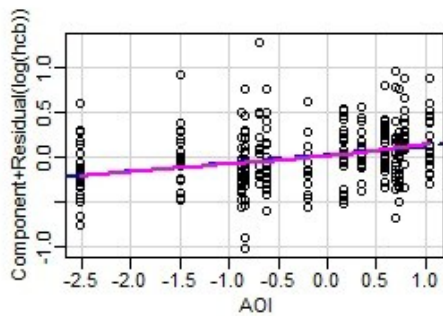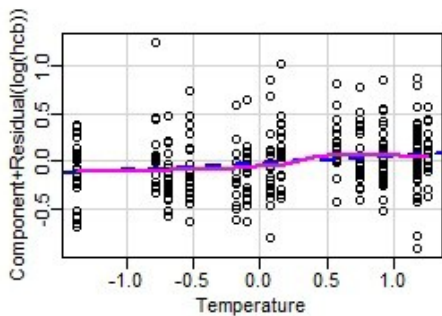

Supplement: c9em00561g9.pdf [file c9em00561g9.pdf]
